# Supplementary material for: Polysaccharides from Paecilomyces hepiali Prevent Acute Colitis in Association with Modulating Gut Microbiota and Treg/Th17 Immune Balance in Mice
Source: MDPI journal article supplement (doi:10.3390/molecules28134984), 2023-06-25
Supplement: s1 [file s1]

**Supplementary Table S1. Primers used for RT-qPCR**

| Gene name                     | Primer's sequence                                        |
|-------------------------------|----------------------------------------------------------|
| <i>GAPDH</i>                  | F:GGTTGTCTCCTGCGACTTCA<br>R:TGGTCCAGGGTTTCTTACTCC        |
| <i>IL-10</i>                  | F:GGTTGTCGTCTCATTCTGAAAGA<br>R:GGTAGAGGACCCAAGTTCGTTAAGA |
| <i>IL-6</i>                   | F:CTTCTTGGGACTGATGCTGGTGAC<br>R:AGGTCTGTTGGGAGTGGTATCCTC |
| <i>TNF<math>\alpha</math></i> | F:ATGTCTCAGCCTCTTCTCATTC<br>R:GCTTGTCACTCGAATTTTGAGA     |
| <i>IL-1<math>\beta</math></i> | F:TCGCAGCAGCACATCAACAAGAG<br>R:AGGTCCACGGGAAAGACACAGG    |
| <i>ZO-1</i>                   | F:CTGGTGAAGTCTCGGAAAAATG<br>R:CATCTCTTGCTGCCAAACTATC     |
| <i>Claudin-1</i>              | F:AGATACAGTGCAAAGTCTTCGA<br>R:CAGGATGCCAATTACCATCAAG     |
| <i>Occludin</i>               | F:TGCTTCATCGCTTCCTTAGTAA<br>R:GGGTTCACTCCCATTATGTACA     |

F: Forward; R: Reverse
